# Supplementary material
Source: publisher site journal article supplement (https://www.dovepress.com/article/supplementary_file/599598/599598_Table%20S1_1.docx)
Supplement: Supplementary file 1 [file 599598_Table%20S1_1.docx]

| **Table S1. STROBE Checklist** | | | |
| --- | --- | --- | --- |
| **Item No.** | **Recommendation** | **Page No.** | **Relevant Text from Manuscript / Summary** |
| **1(a)** | Indicate the study’s design in the title or abstract | Page 1 | Title: *“Determinants of Medication Non-adherence in 1,750 Indonesian Adults with Chronic Diseases: A Nationwide Cross-sectional Study*.” |
| **1(b)** | Provide informative and balanced summary in abstract | Page 2 | Abstract includes purpose, methods results, and conclusion. |
| **2** | Explain scientific background and rationale | Page 3 | The growing burden of chronic diseases in Indonesia, combined with widespread medication non-adherence and its serious clinical and economic consequences, underscores the urgent need for robust, population-level evidence on the factors influencing adherence across diverse patient and health system contexts. |
| **3** | State specific objectives | Page 3 | “This study aimed to identify factors associated with medication non-adherence in patients with chronic diseases in Indonesia.” |
| **4** | Present key elements of study design early | Page 4 | Methods section starts with: “This study is reported in accordance with the Consensus-Based Checklist for Reporting of Survey Studies (CROSS)” |
| **5** | Describe setting, locations, and relevant dates | Page 4 | Data source: Nationwide primary data via online surveys that was conducted between April and November 2024 distributed across all 34 provinces of Indonesia.  Data collection involved online survey distributed across all 34 provinces of Indonesia. |
| **6** | Eligibility criteria and selection of participants | Page 4-5 | Inclusion: ≥20-74 years old, diagnosed with at least one chronic disease in the past month. Exclusion: Incomplete data on medication adherence. |
| **7** | Define outcomes, exposures, confounders | Page 5–6 | Dependent: medication adherence (single self-report). Independent: age, sex, province, working status, education, smoking habit, marital status, monthly income, health insurance ownership, access to healthcare facility, urban or rural residency, self-perceived health status, and health-seeking behavior. |
| **8** | Data sources and measurement methods | Page 5–6 | Source: Online surveys that was conducted between April and November 2024 distributed across all 34 provinces of Indonesia; single items for adherence and medication information. |
| **9** | Describe efforts to address bias | Page 4-6 | Limitation acknowledges potential recall and social desirability bias from self-report; also addresses absence of sampling weights and cross-sectional limits. |
| **10** | Explain how study size was arrived at | Page 8 | A total of 1,750 participants were included in the analysis after excluding those with missing medication adherence data or without a chronic disease. |
| **11** | Handling of quantitative variables | Page 5 | Continuous variables (e.g., age) categorized into groups. |
| **12(a)** | Describe all statistical methods incl. confounder control | Page 7 | Bivariate analysis (Chi-square) and binary logistic regression with covariate adjustment. adjusted odds ratios with 95% CI reported. |
| **12(b)** | Methods for subgroup or interaction | Page 7 | Subgroup analysis was conducted by gender. |
| **12(c)** | Explain how missing data were addressed | Page 7 | Missing data were handled using complete case analysis. |
| **12(d)** | Analytical methods accounting for sampling | Page 13-14 | States limitation: sampling weights not applied, may affect accuracy of estimates. |
| **12(e)** | Sensitivity analyses | – | NA |
| **13(a)** | Report numbers at each study stage | Page 8 | Figure 1 presents selection flow: eligible, excluded, and final analytic sample. |
| **13(b)** | Reasons for non-participation | Page 8 | Excluded for refusal or incomplete data (stated). |
| **13(c)** | Flow diagram | Page 8 | Figure 1: “Respondent selection process.” |
| **14(a)** | Characteristics of participants | Page 8 | Table 1 shows sociodemographic and hypertension-related characteristics by adherence status. |
| **14(b)** | Missing data numbers per variable | – | NA |
| **15** | Report numbers of outcome events or summary measures | Page 8-9 | Table 1,2,3. |
| **16(a)** | Give unadjusted and adjusted estimates | Page 9 | Table 2 dan 3 shows crude and adjusted ORs with 95% CIs for non-adherence. |
| **16(b)** | Report category boundaries | Page 6-7 | Categories for each variable stated in the method section. |
| **17** | Report other analyses (subgroup/sensitivity) | – | NA |
| **18** | Summarise key results | Page 10 | Discussion begins by summarizing prevalence of non-adherence and associated factors. |
| **19** | Discuss limitations and bias | Page 12-13 | Limitations stated: self-report bias, the use of single self-report questions, cross-sectional design, absence of sampling weights, and lacked information on other potentially relevant factors. |
| **20** | Overall interpretation considering context | Page 10–12 | Discussion integrates findings with prior studies. |
| **21** | Discuss generalisability | Page 13 | The strength of this study is its use of a nationwide dataset, which enhances the generalisability and external validity of the findings. |
| **22** | Funding and role of funders | Page 15 | This research is funded by the Indonesian Endowment Fund for Education (LPDP) on behalf of the Indonesian Ministry of Higher Education, Science and Technology, and managed under the EQUITY Program (No. 4303/ B3/DT.03.08/2025 and 3927/UN6. RKT/HK.07.00/2025). |
